# Supplementary material
Source: bioRxiv or medRxiv preprint supplement (https://www.biorxiv.org/highwire/filestream/91577/field_highwire_adjunct_files/1/295097-2.pdf)

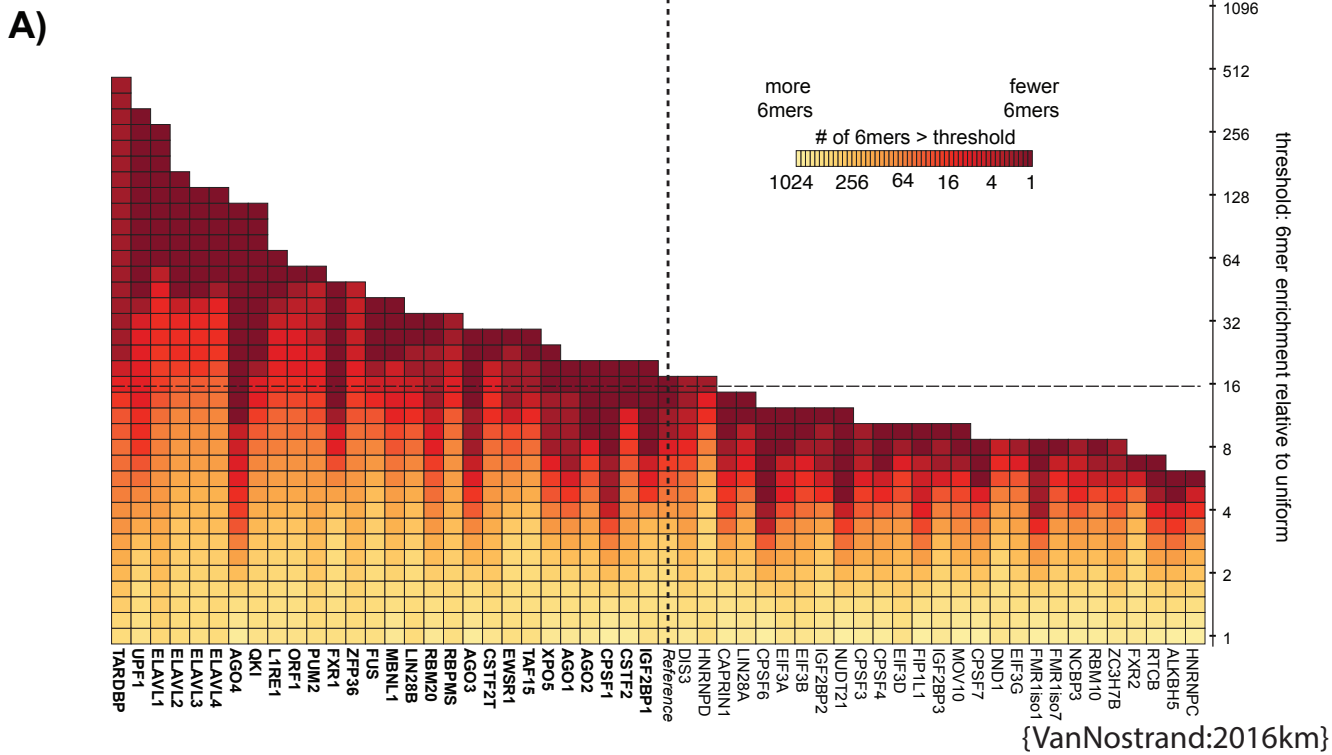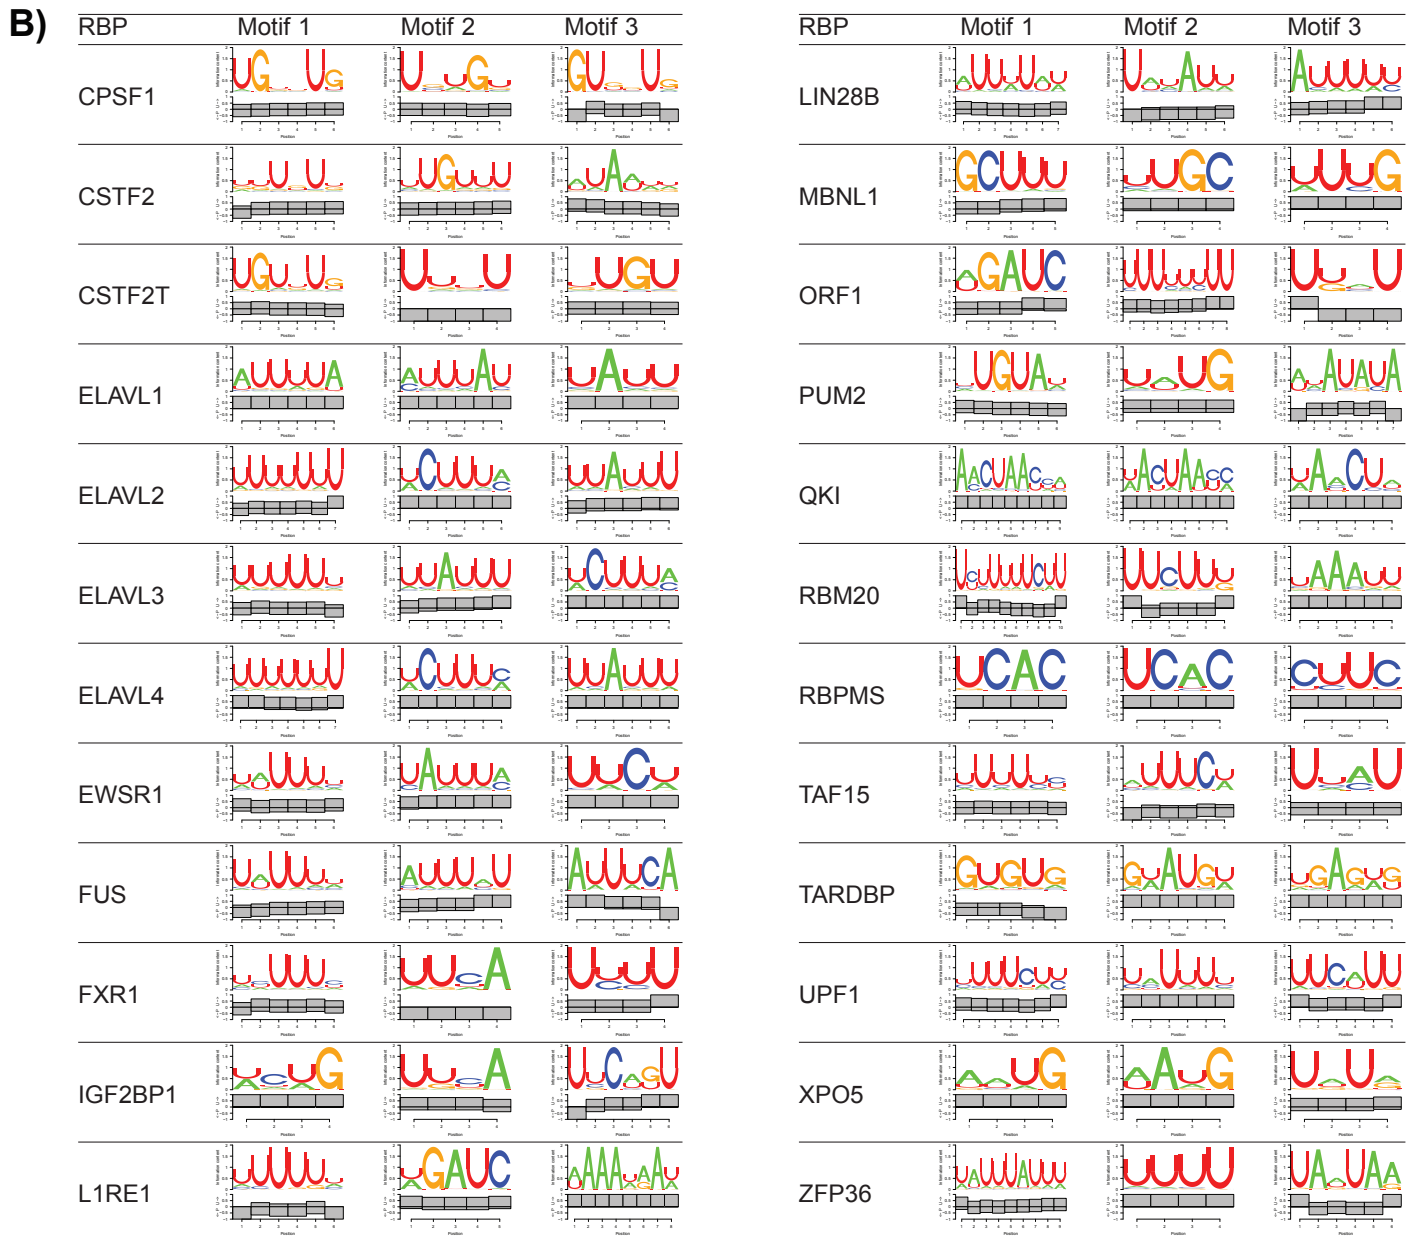

Supplement: Supplementary file [file 295097-2.pdf]
